# Supplementary material for: Identification of selective cytotoxic and synthetic lethal drug responses in triple negative breast cancer cells
Source: Springer Nature journal article supplement (doi:10.1186/s12943-016-0517-3), 2016-05-09

# Gautam\_Molecular Cancer\_Figure S3

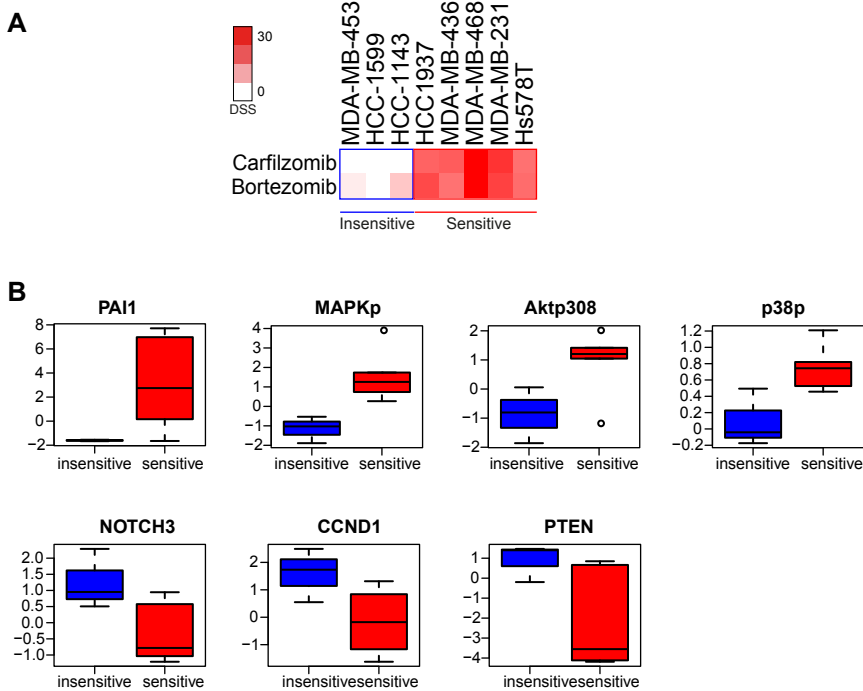

Supplement: MOESM7 [file 10111314]
