# Supplementary material for: Identification of selective cytotoxic and synthetic lethal drug responses in triple negative breast cancer cells
Source: Springer Nature journal article supplement (doi:10.1186/s12943-016-0517-3), 2016-05-09
Supplement: MOESM8 [file 10111314]

# Gautam\_Molecular Cancer\_Figure S4

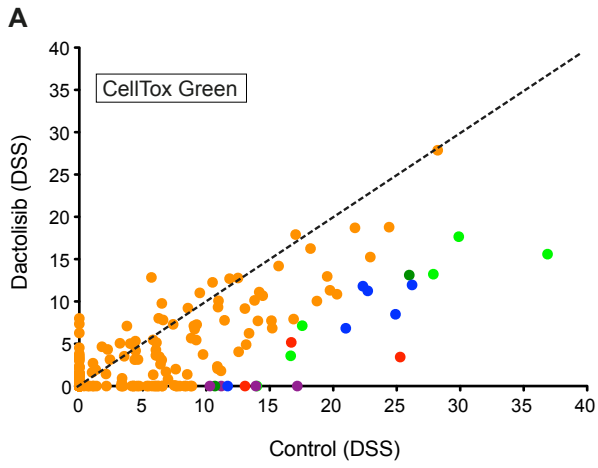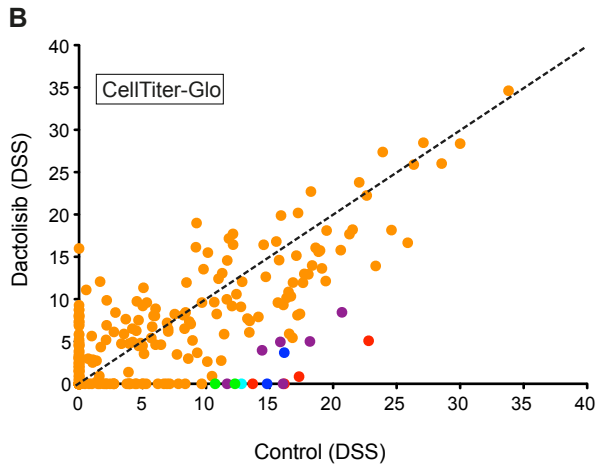

**C**

| DRUG CLASSES                | DRUG NAMES                                                                        |
|-----------------------------|-----------------------------------------------------------------------------------|
| ● Anti-metabolite           | Cytarabine<br>Clofarabine<br>Pevonedistat                                         |
| ● Anti-mitotic              | Patupilone<br>Ixabepilone<br>Vinorelbine<br>Vinblastin<br>Paclitaxel<br>Docetaxel |
| ● Topoisomerase I inhibitor | Camptotecin<br>Irinotecan                                                         |
| ● Kinase inhibitor          | Midostaurin<br>PF-431396<br>PIK-75<br>BI 2536<br>AT9283<br>Alisertib              |
| ● Other inhibitors          | Mytomycin C<br>Tipifarnib<br>Atorvastatin<br>Thio-TEPA                            |
