# Supplementary material for: Identification of selective cytotoxic and synthetic lethal drug responses in triple negative breast cancer cells
Source: Springer Nature journal article supplement (doi:10.1186/s12943-016-0517-3), 2016-05-09
Supplement: MOESM11 [file 10111314]

# Gautam\_Molecular Cancer\_Figure S8

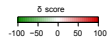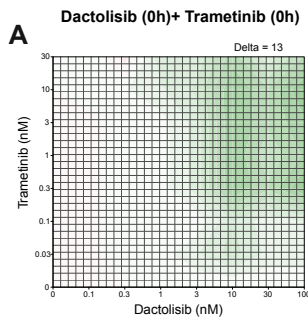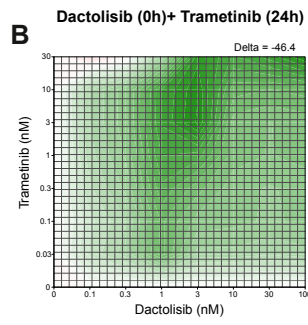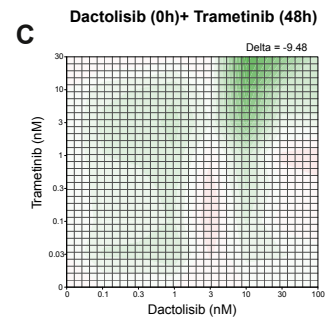

DU4475

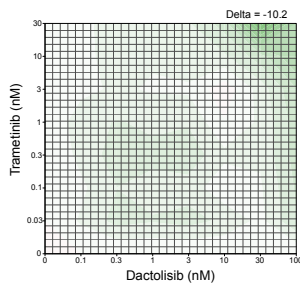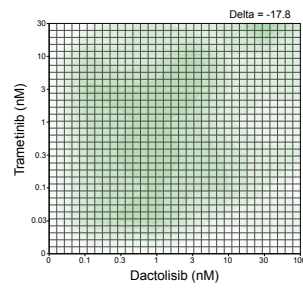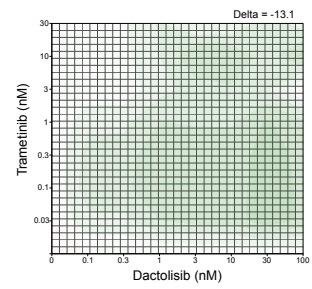

MDA-MB-231
