# Supplementary material for: Identification of selective cytotoxic and synthetic lethal drug responses in triple negative breast cancer cells
Source: Springer Nature journal article supplement (doi:10.1186/s12943-016-0517-3), 2016-05-09
Supplement: MOESM14 [file 10111314]

# Gautam\_Molecular Cancer\_Figure S7

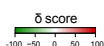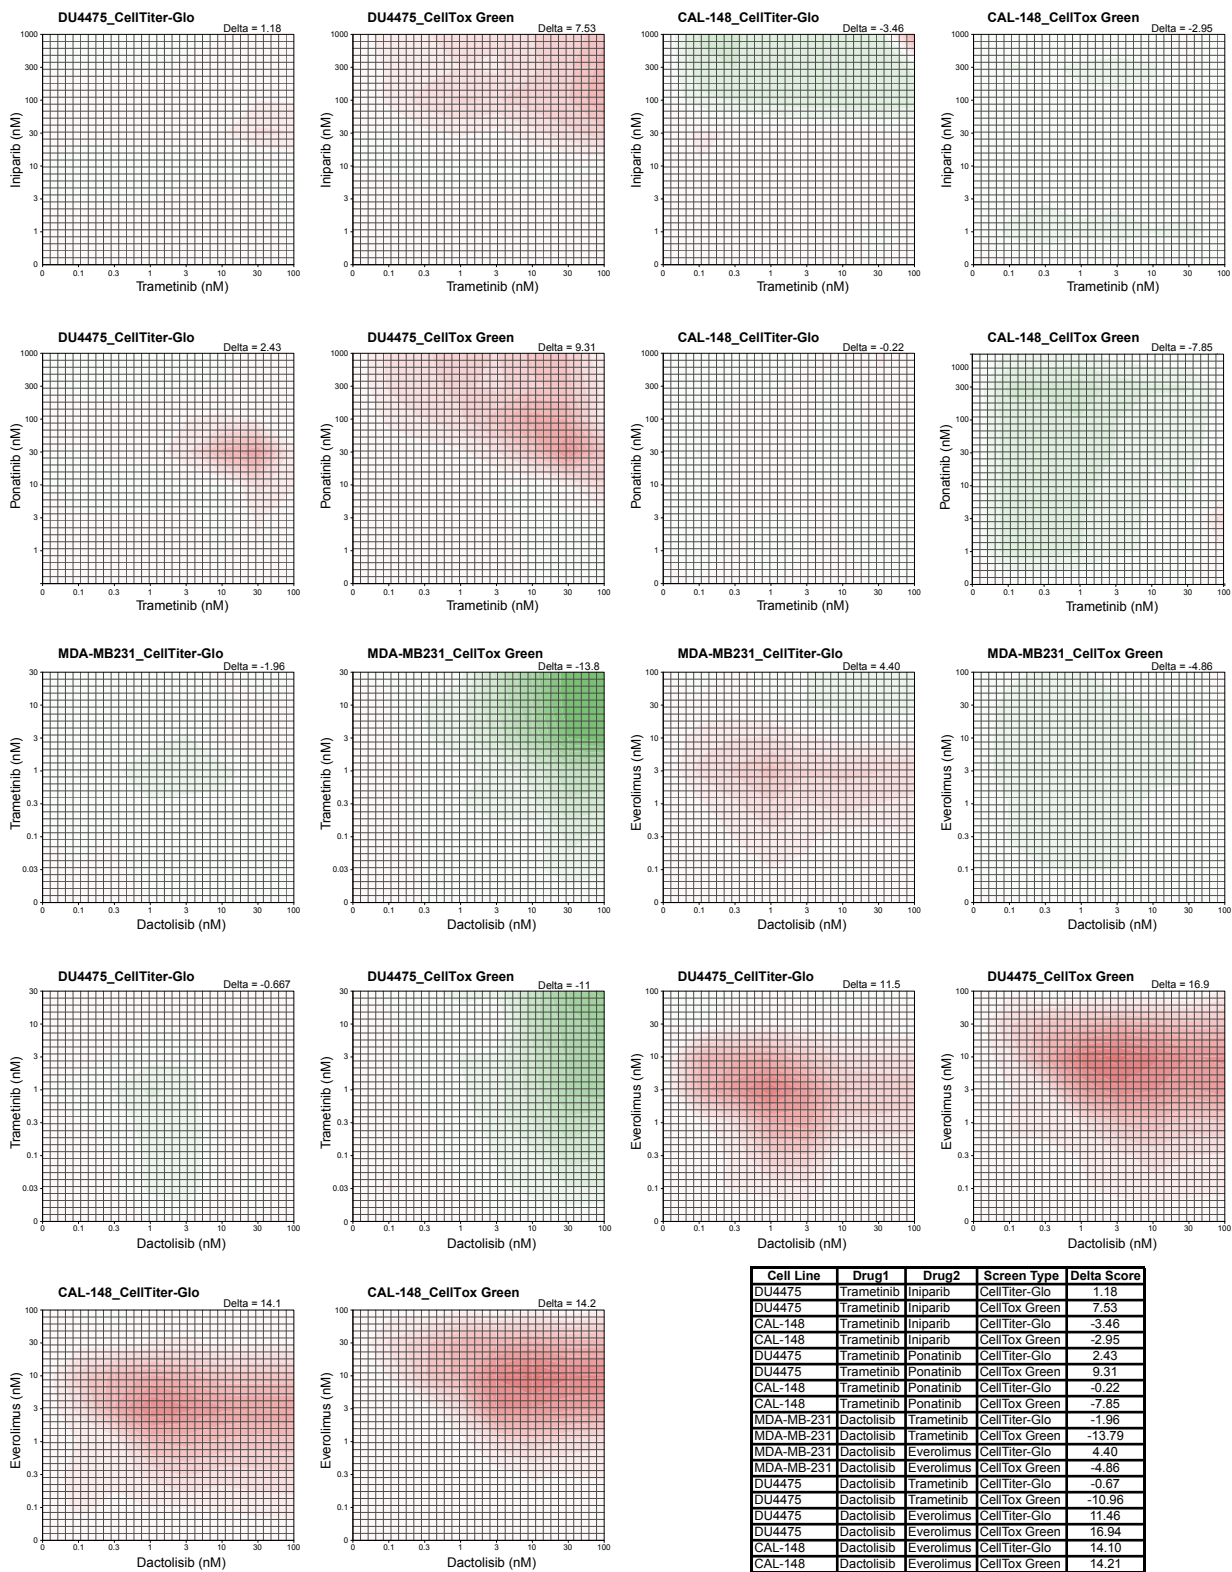

| Cell Line  | Drug1      | Drug2      | Screen Type   | Delta Score |
|------------|------------|------------|---------------|-------------|
| DU4475     | Trametinib | Iniparib   | CellTiter-Glo | 1.18        |
| DU4475     | Trametinib | Iniparib   | CellTox Green | 7.53        |
| CAL-148    | Trametinib | Iniparib   | CellTiter-Glo | -3.46       |
| CAL-148    | Trametinib | Iniparib   | CellTox Green | -2.95       |
| DU4475     | Trametinib | Ponatinib  | CellTiter-Glo | 2.43        |
| DU4475     | Trametinib | Ponatinib  | CellTox Green | 9.31        |
| CAL-148    | Trametinib | Ponatinib  | CellTiter-Glo | -0.22       |
| CAL-148    | Trametinib | Ponatinib  | CellTox Green | -7.85       |
| MDA-MB-231 | Dactolisib | Trametinib | CellTiter-Glo | -1.96       |
| MDA-MB-231 | Dactolisib | Trametinib | CellTox Green | -13.79      |
| MDA-MB-231 | Dactolisib | Everolimus | CellTiter-Glo | 4.40        |
| MDA-MB-231 | Dactolisib | Everolimus | CellTox Green | -4.86       |
| DU4475     | Dactolisib | Trametinib | CellTiter-Glo | -0.67       |
| DU4475     | Dactolisib | Trametinib | CellTox Green | -10.96      |
| DU4475     | Dactolisib | Everolimus | CellTiter-Glo | 11.46       |
| DU4475     | Dactolisib | Everolimus | CellTox Green | 16.94       |
| CAL-148    | Dactolisib | Everolimus | CellTiter-Glo | 14.10       |
| CAL-148    | Dactolisib | Everolimus | CellTox Green | 14.21       |
